# Supplementary material for: Asymmetric nitrogen-rich energetic materials resulting from the combination of tetrazolyl, dinitromethyl and (1,2,4-oxadiazol-5-yl)nitroamino groups with furoxan
Source: Royal Society of Chemistry journal article supplement (doi:10.1039/c8dt03616k), 2018-01-01
Supplement: c8dt03616k1.pdf [file c8dt03616k1.pdf]

**Asymmetric nitrogen-riched energetic materials resulting from  
the combination of tetrazolyl, dinitromethyl and (1,2,4-  
oxadiazol-5-yl)nitroamino group with furoxan**

Yingle Liu<sup>a,b \*</sup>, Chunlin He<sup>a</sup>, Yongxing Tang<sup>a</sup>, Gregory H. Imler<sup>c</sup>, Damon A. Parrish<sup>c</sup>,  
and Jean'ne M. Shreeve<sup>a \*</sup>

(a) Department of Chemistry, University of Idaho, Moscow, ID 83844-2343, USA.

(b) School of Chemistry and Environmental Engineering, Sichuan University of Science &  
Engineering, 180 Xueyuan Street, Huixing Lu, Zigong, Sichuan 643000 (China)

(c) Dr. G. H. Imler, Dr. D. A. Parrish Naval Research Laboratory 4555 Overlook Avenue  
Washington, D.C. 20375 USA

E-mail: [jshreeve@uidaho.edu](mailto:jshreeve@uidaho.edu); [liuyingleyou@163.com](mailto:liuyingleyou@163.com)

## Table of Contents

|                             | Page |
|-----------------------------|------|
| 1. Crystal Structure Data   | S3   |
| 2. Theoretical Calculations | S7   |

## 1. Crystal Structure Data

**Table S1.** Crystal data and structure refinement for **7**.

| Identification code               | <b>7</b>                                                     |                 |
|-----------------------------------|--------------------------------------------------------------|-----------------|
| CCDC number                       | 1860916                                                      |                 |
| Empirical formula                 | C <sub>4</sub> H <sub>8</sub> N <sub>10</sub> O <sub>6</sub> |                 |
| Formula weight                    | 292.20                                                       |                 |
| Temperature                       | 150(2) K                                                     |                 |
| Wavelength                        | 1.54178 Å                                                    |                 |
| Crystal system                    | Triclinic                                                    |                 |
| Space group                       | P -1                                                         |                 |
| Unit cell dimensions              | a = 7.4560(3) Å                                              | β = 73.599(2)°. |
|                                   | b = 8.5912(3) Å                                              | γ = 83.431(2)°. |
|                                   | c = 9.9008(4) Å                                              | α = 65.465(2)°. |
| Volume                            | 553.46(4) Å <sup>3</sup>                                     |                 |
| Z                                 | 2                                                            |                 |
| Density (-123°C)                  | 1.753 Mg/m <sup>3</sup>                                      |                 |
| Density (20°C)                    | 1.717 Mg/m <sup>3</sup>                                      |                 |
| Absorption coefficient            | 1.416 mm <sup>-1</sup>                                       |                 |
| F(000)                            | 300                                                          |                 |
| Crystal size                      | 0.189 x 0.154 x 0.091 mm <sup>3</sup>                        |                 |
| Theta range for data collection   | 4.656 to 74.406°.                                            |                 |
| Index ranges                      | -9 ≤ h ≤ 7, -10 ≤ k ≤ 9, -12 ≤ l ≤ 9                         |                 |
| Reflections collected             | 3309                                                         |                 |
| Independent reflections           | 1795 [R <sub>int</sub> = 0.0192]                             |                 |
| Completeness to theta = 67.679°   | 83.2 %                                                       |                 |
| Absorption correction             | Semi-empirical from equivalents                              |                 |
| Max. and min. transmission        | 0.7538 and 0.6533                                            |                 |
| Refinement method                 | Full-matrix least-squares on F <sup>2</sup>                  |                 |
| Data / restraints / parameters    | 1795 / 18 / 206                                              |                 |
| Goodness-of-fit on F <sup>2</sup> | 1.111                                                        |                 |
| Final R indices [I > 2σ(I)]       | R <sub>1</sub> = 0.0381, wR <sub>2</sub> = 0.1015            |                 |
| R indices (all data)              | R <sub>1</sub> = 0.0422, wR <sub>2</sub> = 0.1096            |                 |
| Extinction coefficient            | 0.026(2)                                                     |                 |
| Largest diff. peak and hole       | 0.426 and -0.310 e.Å <sup>-3</sup>                           |                 |

**Table S2.** Crystal data and structure refinement for **13**.

| Identification code               | <b>13</b>                                                    |                 |
|-----------------------------------|--------------------------------------------------------------|-----------------|
| CCDC number                       | 1860917                                                      |                 |
| Empirical formula                 | C <sub>5</sub> H <sub>8</sub> N <sub>12</sub> O <sub>5</sub> |                 |
| Formula weight                    | 316.23                                                       |                 |
| Temperature                       | 296(2) K                                                     |                 |
| Wavelength                        | 0.71073 Å                                                    |                 |
| Crystal system                    | Triclinic                                                    |                 |
| Space group                       | P-1                                                          |                 |
| Unit cell dimensions              | a = 7.1220(7) Å                                              | a = 76.121(6)°. |
|                                   | b = 7.5186(9) Å                                              | b = 74.829(6)°. |
|                                   | c = 12.6185(17) Å                                            | g = 67.346(5)°. |
| Volume                            | 594.44(13) Å <sup>3</sup>                                    |                 |
| Z                                 | 2                                                            |                 |
| Density (20°C)                    | 1.767 Mg/m <sup>3</sup>                                      |                 |
| Absorption coefficient            | 0.155 mm <sup>-1</sup>                                       |                 |
| F(000)                            | 324                                                          |                 |
| Crystal size                      | 0.210 x 0.107 x 0.030 mm <sup>3</sup>                        |                 |
| Theta range for data collection   | 2.972 to 29.967°.                                            |                 |
| Index ranges                      | -9<=h<=9, -10<=k<=10, -17<=l<=17                             |                 |
| Reflections collected             | 7147                                                         |                 |
| Independent reflections           | 3264 [R <sub>int</sub> = 0.0289]                             |                 |
| Completeness to theta = 25.242°   | 99.2 %                                                       |                 |
| Absorption correction             | Semi-empirical from equivalents                              |                 |
| Max. and min. transmission        | 0.7460 and 0.6808                                            |                 |
| Refinement method                 | Full-matrix least-squares on F <sup>2</sup>                  |                 |
| Data / restraints / parameters    | 3264 / 16 / 223                                              |                 |
| Goodness-of-fit on F <sup>2</sup> | 1.001                                                        |                 |
| Final R indices [I>2sigma(I)]     | R <sub>1</sub> = 0.0437, wR <sub>2</sub> = 0.0928            |                 |
| R indices (all data)              | R <sub>1</sub> = 0.0917, wR <sub>2</sub> = 0.1124            |                 |
| Largest diff. peak and hole       | 0.226 and -0.230 e.Å <sup>-3</sup>                           |                 |

**Table S3.** Crystal data and structure refinement for **20**.

| Identification code               | <b>20</b>                                                   |                  |
|-----------------------------------|-------------------------------------------------------------|------------------|
| CCDC number                       | 1860918                                                     |                  |
| Empirical formula                 | C <sub>5</sub> K <sub>2</sub> N <sub>8</sub> O <sub>9</sub> |                  |
| Formula weight                    | 394.33                                                      |                  |
| Temperature                       | 293(2) K                                                    |                  |
| Wavelength                        | 1.54178 Å                                                   |                  |
| Crystal system                    | Triclinic                                                   |                  |
| Space group                       | P-1                                                         |                  |
| Unit cell dimensions              | a = 7.2945(15) Å                                            | a = 95.648(8)°.  |
|                                   | b = 7.6721(16) Å                                            | b = 95.017(8)°.  |
|                                   | c = 12.581(3) Å                                             | g = 117.937(8)°. |
| Volume                            | 611.8(2) Å <sup>3</sup>                                     |                  |
| Z                                 | 2                                                           |                  |
| Density (20°C)                    | 2.141 Mg/m <sup>3</sup>                                     |                  |
| Absorption coefficient            | 7.639 mm <sup>-1</sup>                                      |                  |
| F(000)                            | 392                                                         |                  |
| Crystal size                      | 0.315 x 0.246 x 0.086 mm <sup>3</sup>                       |                  |
| Theta range for data collection   | 3.572 to 74.645°.                                           |                  |
| Index ranges                      | -8<=h<=9, -9<=k<=9, -15<=l<=15                              |                  |
| Reflections collected             | 7674                                                        |                  |
| Independent reflections           | 2437 [R <sub>int</sub> = 0.0410]                            |                  |
| Completeness to theta = 67.679°   | 98.6 %                                                      |                  |
| Absorption correction             | Semi-empirical from equivalents                             |                  |
| Max. and min. transmission        | 0.7538 and 0.4145                                           |                  |
| Refinement method                 | Full-matrix least-squares on F <sup>2</sup>                 |                  |
| Data / restraints / parameters    | 2437 / 0 / 218                                              |                  |
| Goodness-of-fit on F <sup>2</sup> | 1.033                                                       |                  |
| Final R indices [I>2sigma(I)]     | R <sub>1</sub> = 0.0297, wR <sub>2</sub> = 0.0782           |                  |
| R indices (all data)              | R <sub>1</sub> = 0.0353, wR <sub>2</sub> = 0.0794           |                  |
| Extinction coefficient            | 0.0214(12)                                                  |                  |
| Largest diff. peak and hole       | 0.232 and -0.406 e.Å <sup>-3</sup>                          |                  |

**Table S4.** Crystal data and structure refinement for **22**.

| Identification code                     | <b>22</b>                                                          |                            |
|-----------------------------------------|--------------------------------------------------------------------|----------------------------|
| CCDC number                             | 1860646                                                            |                            |
| Empirical formula                       | $C_5H_5KN_{10}O_9$                                                 |                            |
| Formula weight                          | 388.29                                                             |                            |
| Temperature                             | 293(2) K                                                           |                            |
| Wavelength                              | 0.71073 Å                                                          |                            |
| Crystal system                          | Monoclinic                                                         |                            |
| Space group                             | $P2_1/c$                                                           |                            |
| Unit cell dimensions                    | $a = 7.7155(2)$ Å                                                  | $a = 90^\circ$ .           |
|                                         | $b = 10.5198(2)$ Å                                                 | $b = 100.9850(10)^\circ$ . |
|                                         | $c = 16.7965(4)$ Å                                                 | $g = 90^\circ$ .           |
| Volume                                  | $1338.32(5)$ Å <sup>3</sup>                                        |                            |
| Z                                       | 4                                                                  |                            |
| Density (20°C)                          | 1.927 Mg/m <sup>3</sup>                                            |                            |
| Absorption coefficient                  | 0.478 mm <sup>-1</sup>                                             |                            |
| F(000)                                  | 784                                                                |                            |
| Crystal size                            | 0.208 x 0.119 x 0.082 mm <sup>3</sup>                              |                            |
| Theta range for data collection         | 2.296 to 30.089°.                                                  |                            |
| Index ranges                            | $-10 \leq h \leq 10$ , $-14 \leq k \leq 14$ , $-22 \leq l \leq 23$ |                            |
| Reflections collected                   | 15653                                                              |                            |
| Independent reflections                 | 3815 [ $R_{int} = 0.0199$ ]                                        |                            |
| Completeness to $\theta = 25.242^\circ$ | 100.0 %                                                            |                            |
| Absorption correction                   | Semi-empirical from equivalents                                    |                            |
| Max. and min. transmission              | 0.7460 and 0.7045                                                  |                            |
| Refinement method                       | Full-matrix least-squares on $F^2$                                 |                            |
| Data / restraints / parameters          | 3815 / 18 / 259                                                    |                            |
| Goodness-of-fit on $F^2$                | 1.030                                                              |                            |
| Final R indices [ $I > 2\sigma(I)$ ]    | $R_1 = 0.0303$ , $wR_2 = 0.0775$                                   |                            |
| R indices (all data)                    | $R_1 = 0.0414$ , $wR_2 = 0.0834$                                   |                            |
| Largest diff. peak and hole             | 0.308 and -0.202 e.Å <sup>-3</sup>                                 |                            |

**Table S5.** Hydrogen bonds for **7** [Å and °]

|        | x         | y        | z        | U(eq) |
|--------|-----------|----------|----------|-------|
| H(19A) | 9350(30)  | 1340(20) | 7870(20) | 26    |
| H(19B) | 10020(30) | 420(30)  | 6703(17) | 26    |
| H(19C) | 7970(20)  | 1030(30) | 7110(20) | 26    |
| H(19D) | 9470(30)  | -459(17) | 8086(18) | 26    |
| H(20A) | 7170(30)  | 6000(20) | 3580(20) | 30    |
| H(20B) | 7740(40)  | 5110(30) | 2399(15) | 30    |
| H(20C) | 9200(20)  | 5360(30) | 3040(30) | 30    |
| H(20D) | 8400(30)  | 4066(18) | 3868(19) | 30    |

**Table S6.** Hydrogen bonds for **13** [Å and °]

|        | x        | y        | z         | U(eq) |
|--------|----------|----------|-----------|-------|
| H(22A) | 2990(30) | 2540(20) | 6031(16)  | 59    |
| H(22B) | 1470(30) | 1880(30) | 5759(16)  | 59    |
| H(22C) | 3260(30) | 424(17)  | 6190(18)  | 59    |
| H(22D) | 1650(30) | 1730(30) | 6946(10)  | 59    |
| H(23A) | 7980(30) | 2170(30) | 9250(10)  | 44    |
| H(23B) | 5784(16) | 2480(30) | 9819(17)  | 44    |
| H(23C) | 7420(30) | 758(15)  | 10231(14) | 44    |
| H(23D) | 7300(30) | 2730(20) | 10366(13) | 44    |

## 2 Theoretical Calculations

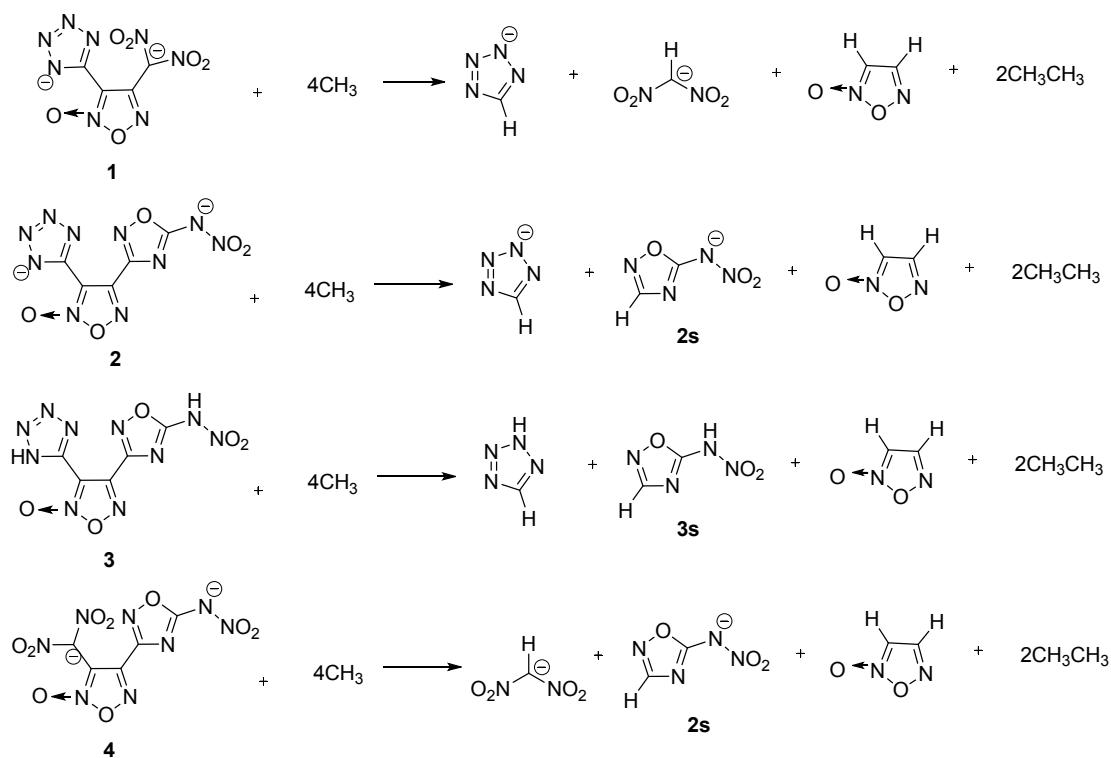**Scheme S1.** Isodesmic reactions for the anions of **1**, **2** and **4**; neutral molecule **3**.

**Table S7.** Calculated zero point energy (*ZPE*), values of the correction (*Hr*), total energy (*E0*) and heats of formation (*HOF*)

| Species                         | <i>ZPE</i> | <i>Hr</i> | <i>E0</i>    | corrected <i>E0</i> | <i>HOF</i> (kJ mol <sup>-1</sup> ) |
|---------------------------------|------------|-----------|--------------|---------------------|------------------------------------|
| 1                               | 0.083423   | 0.098429  | -1039.21499  | -1039.11990         | 310.9900346                        |
| 2                               | 0.09611    | 0.112039  | -1111.458895 | -1111.35070         | 452.3509563                        |
| 3                               | 0.122524   | 0.138947  | -1112.547643 | -1112.41360         | 515.3611076                        |
| 4                               | 0.102014   | 0.120703  | -1302.365758 | -1302.24914         | 37.60963931                        |
| Tetrazole anion                 | 0.033827   | 0.038051  | -257.12423   | -257.08754          | 181.58                             |
| Dinitromethyl anion             | 0.039727   | 0.046604  | -448.0309171 | -447.98590          | -232.98                            |
| furoxan                         | 0.049513   | 0.054822  | -336.4521391 | -336.39930          | 198.5                              |
| CH <sub>3</sub> CH <sub>3</sub> | 0.07461    | 0.079038  | -79.5716305  | -79.49558           | -84                                |
| 2s                              | 0.052589   | 0.060234  | -520.2639482 | -520.20582          | -63.035                            |
| Tetrazole                       | 0.046862   | 0.051291  | -257.6538692 | -257.60445          | 255.1030899                        |
| 3s                              | 0.06575    | 0.073758  | -520.7812403 | -520.71011          | 35.89633344                        |

[a] Data obtained from G2.

[b] Data are from Ref. [D. R. Lide, ed., CRC Handbook of Chemistry and Physics, 88th Edition (Internet Version 2008), CRC Press/Taylor and Francis, Boca Raton, FL.].

**Table S8.** Calculated solid state heat of formation (*HOF*)

| Compound   | $\Delta H_L$ (kJ mol <sup>-1</sup> ) | $\Delta H_f^{\text{Cation}}$ (kJ mol <sup>-1</sup> ) | $\Delta H_f^{\text{Anion}}$ (kJ mol <sup>-1</sup> ) | $\Delta H_f$ (kJ mol <sup>-1</sup> ) |
|------------|--------------------------------------|------------------------------------------------------|-----------------------------------------------------|--------------------------------------|
| <b>e-1</b> | 1347.671628                          | 626.4                                                | 311.0                                               | 216.1283716                          |
| <b>e-2</b> | 1220.034877                          | 575.9                                                | 311.0                                               | 242.7651228                          |
| <b>e-3</b> | 1164.925417                          | 684.4                                                | 311.0                                               | 514.8745831                          |
| <b>f-1</b> |                                      |                                                      |                                                     | 441.2891                             |
| <b>f-2</b> | 1309.0303                            | 626.4                                                | 425.4                                               | 369.1196999                          |
| <b>f-3</b> | 1262.402442                          | 770.0                                                | 425.4                                               | 702.9475582                          |
| <b>f-4</b> | 1288.550473                          | 669.5                                                | 425.4                                               | 475.7995266                          |
| <b>f-6</b> | 1143.407707                          | 684.4                                                | 425.4                                               | 650.7422931                          |
| <b>g-1</b> | 1416.727949                          | 501.1                                                | 37.6                                                | -376.91831                           |
